# Supplementary material for: Selective Proteomic Analysis of Antibiotic-Tolerant Cellular Subpopulations in Pseudomonas aeruginosa Biofilms
Source: PubMed Central journal article supplement (PMC5654934; doi:10.1128/mbio.01593-17), 2017-10-24
Supplement: mbo005173553sf1.pdf [file mbo005173553sf1.pdf]

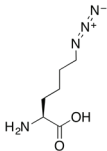

L-azidonorleucine  
(Anl)

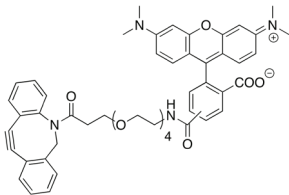

aza-dibenzocyclooctyne-  
carboxytetramethylrhodamine  
(DBCO-TAMRA)

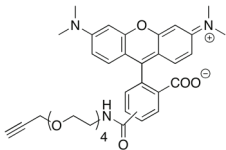

alkyne-carboxytetramethylrhodamine  
(alkyne-TAMRA)

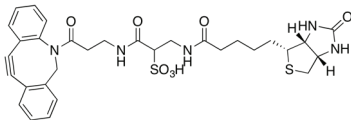

aza-dibenzocyclooctyne-sulfo-biotin  
(DBCO-sulfo-biotin)
