# Supplementary material for: Selective Proteomic Analysis of Antibiotic-Tolerant Cellular Subpopulations in Pseudomonas aeruginosa Biofilms
Source: PubMed Central journal article supplement (PMC5654934; doi:10.1128/mbio.01593-17), 2017-10-24

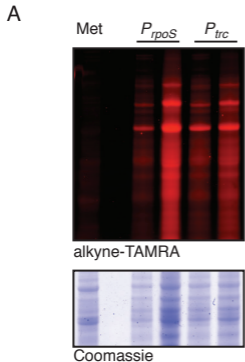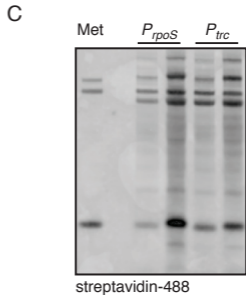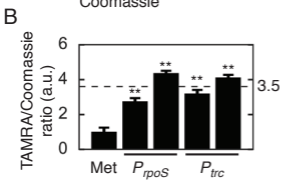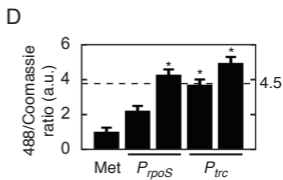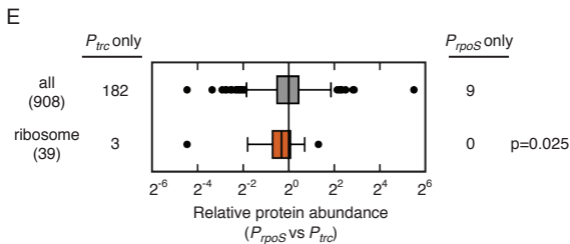

Supplement: mbo005173553sf3.pdf [file mbo005173553sf3.pdf]
